# Supplementary figures and images for: Urine proteomic signatures predicting the progression from premalignancy to malignant gastric cancer
Source: PubMed Central journal article supplement — eBioMedicine. 2022 Nov 7;86:104340. doi: 10.1016/j.ebiom.2022.104340 (PMC9649370; doi:10.1016/j.ebiom.2022.104340), 2022-11-07

SG

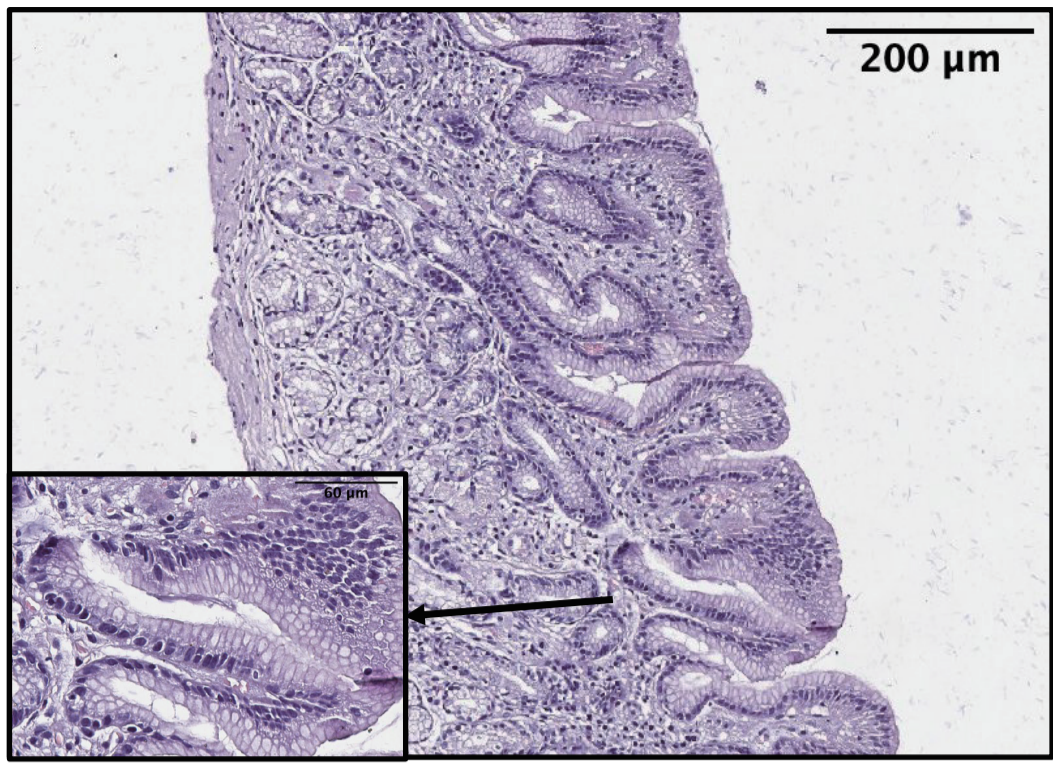

CAG

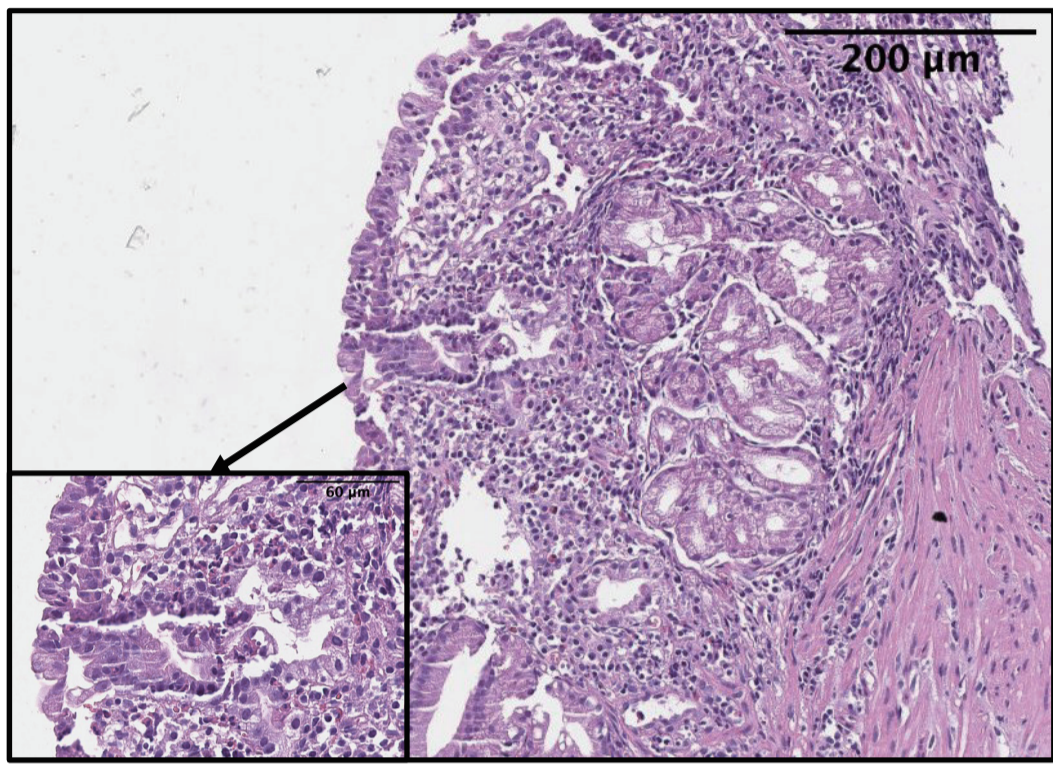

IM

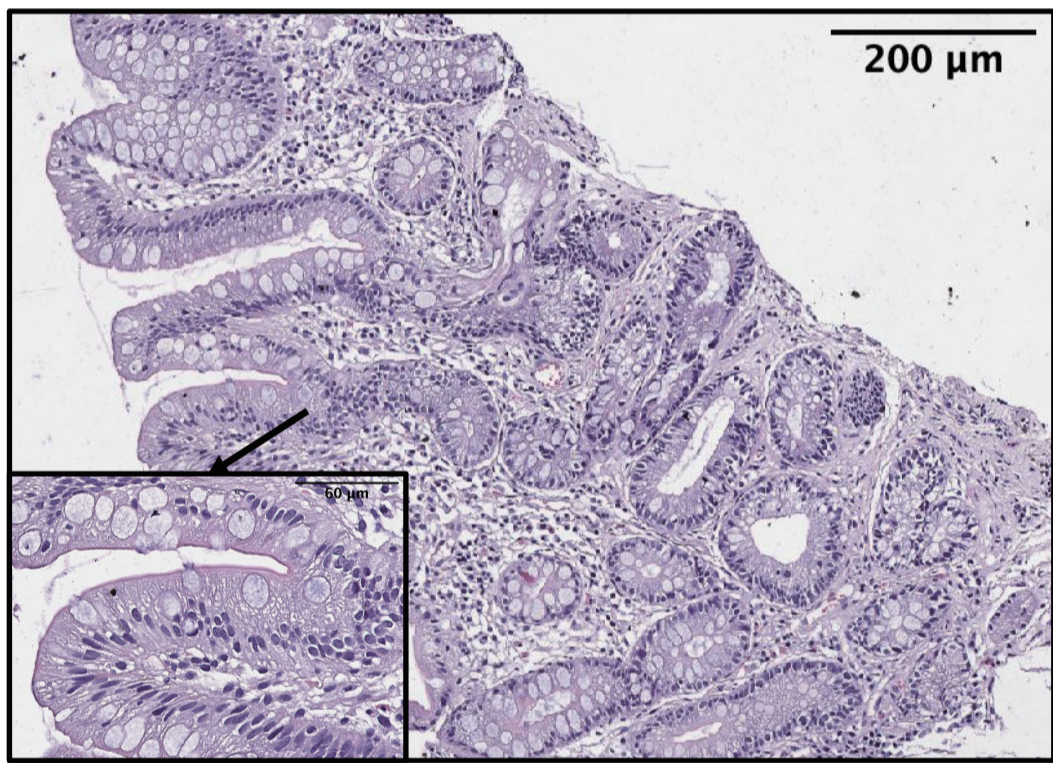

LGIN

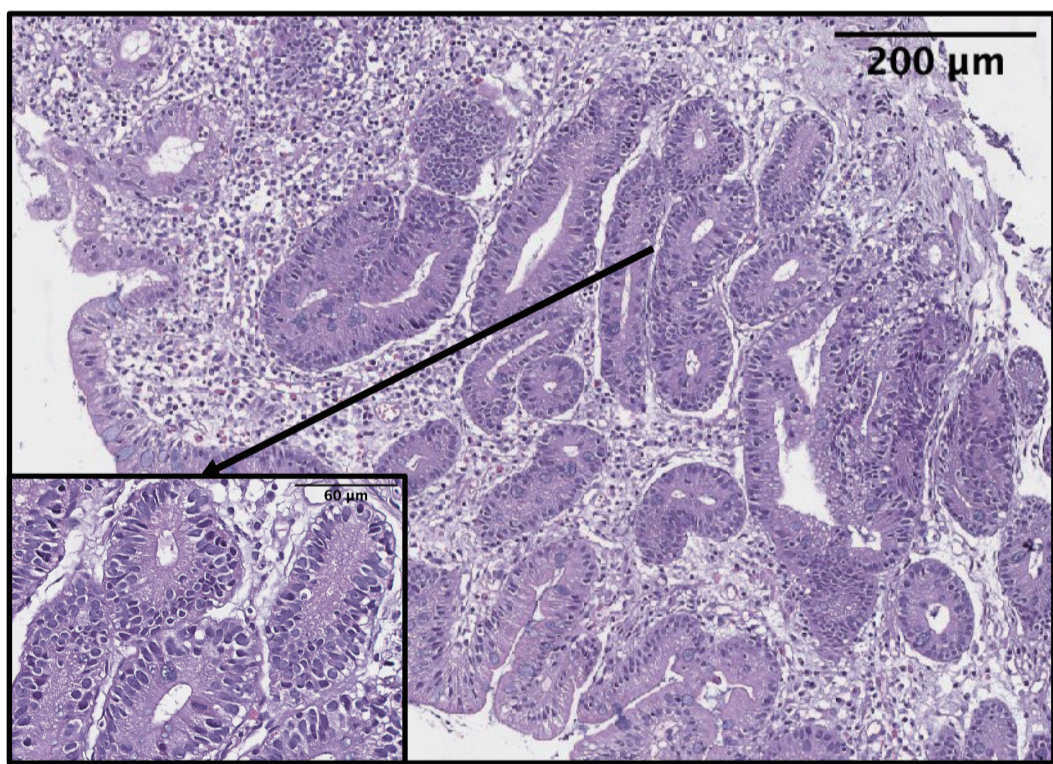

HGIN

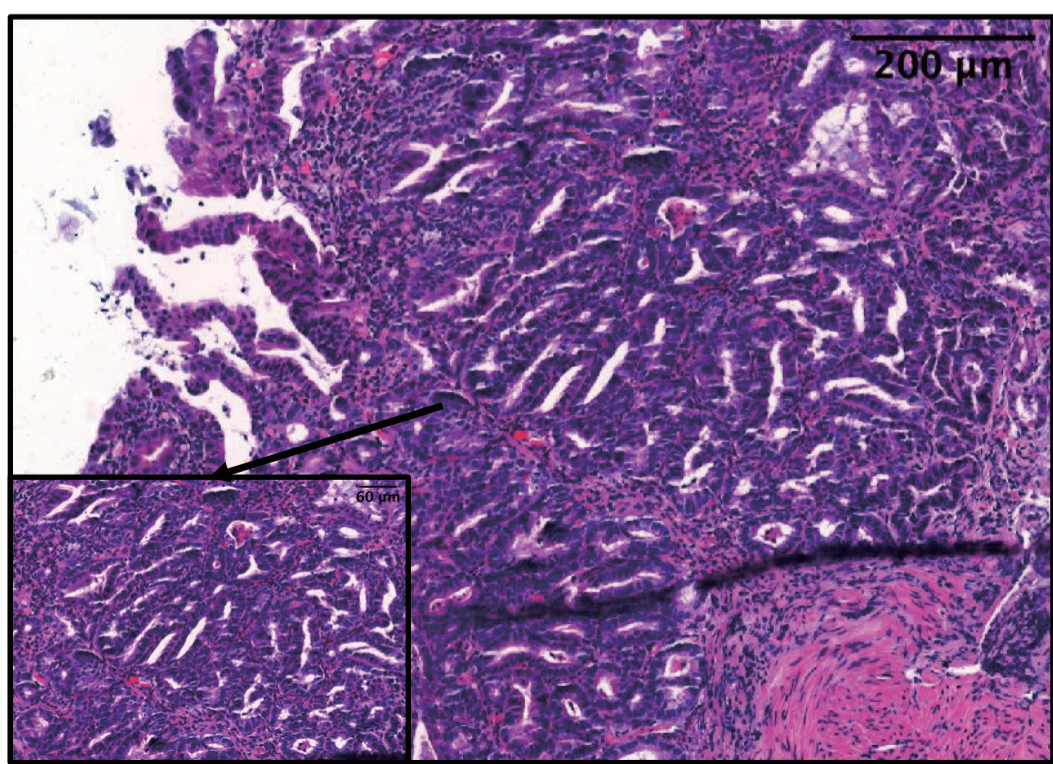

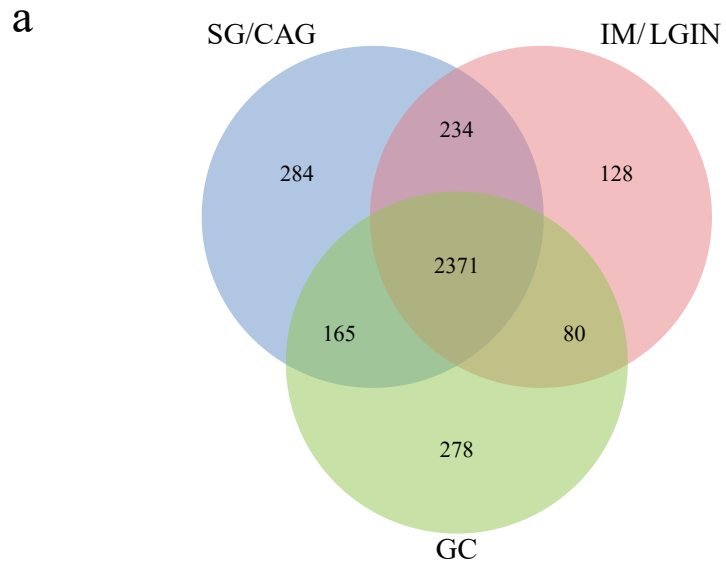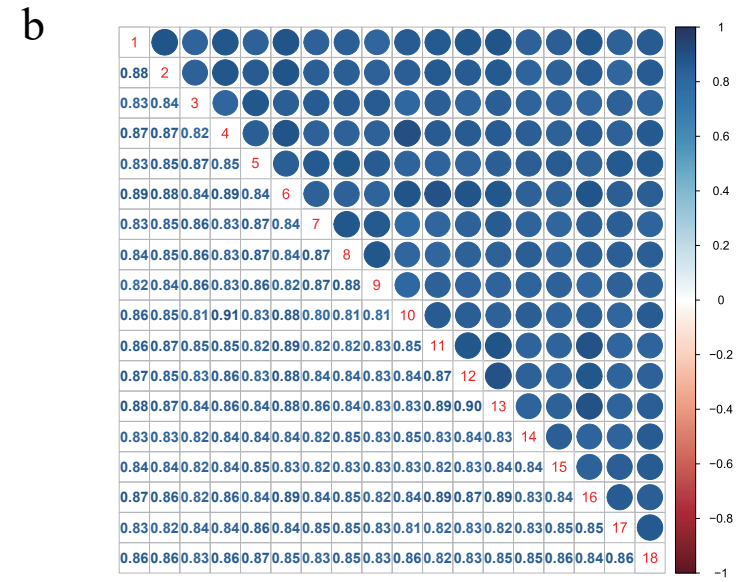

**c**

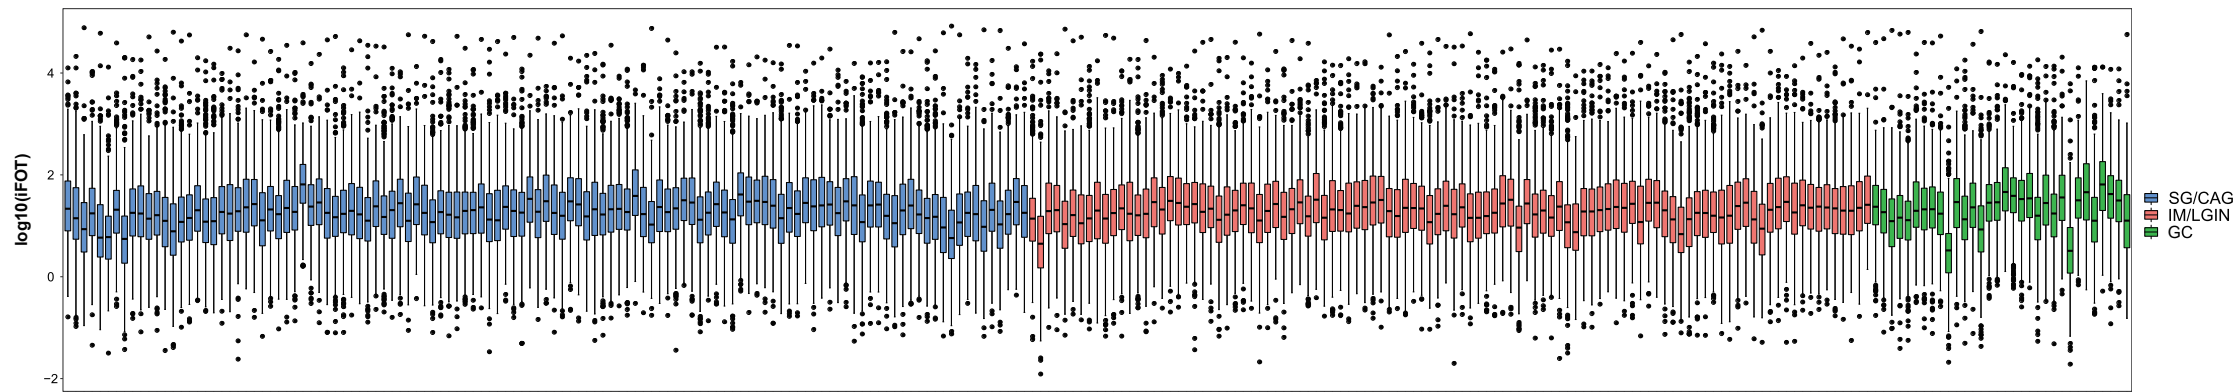

a

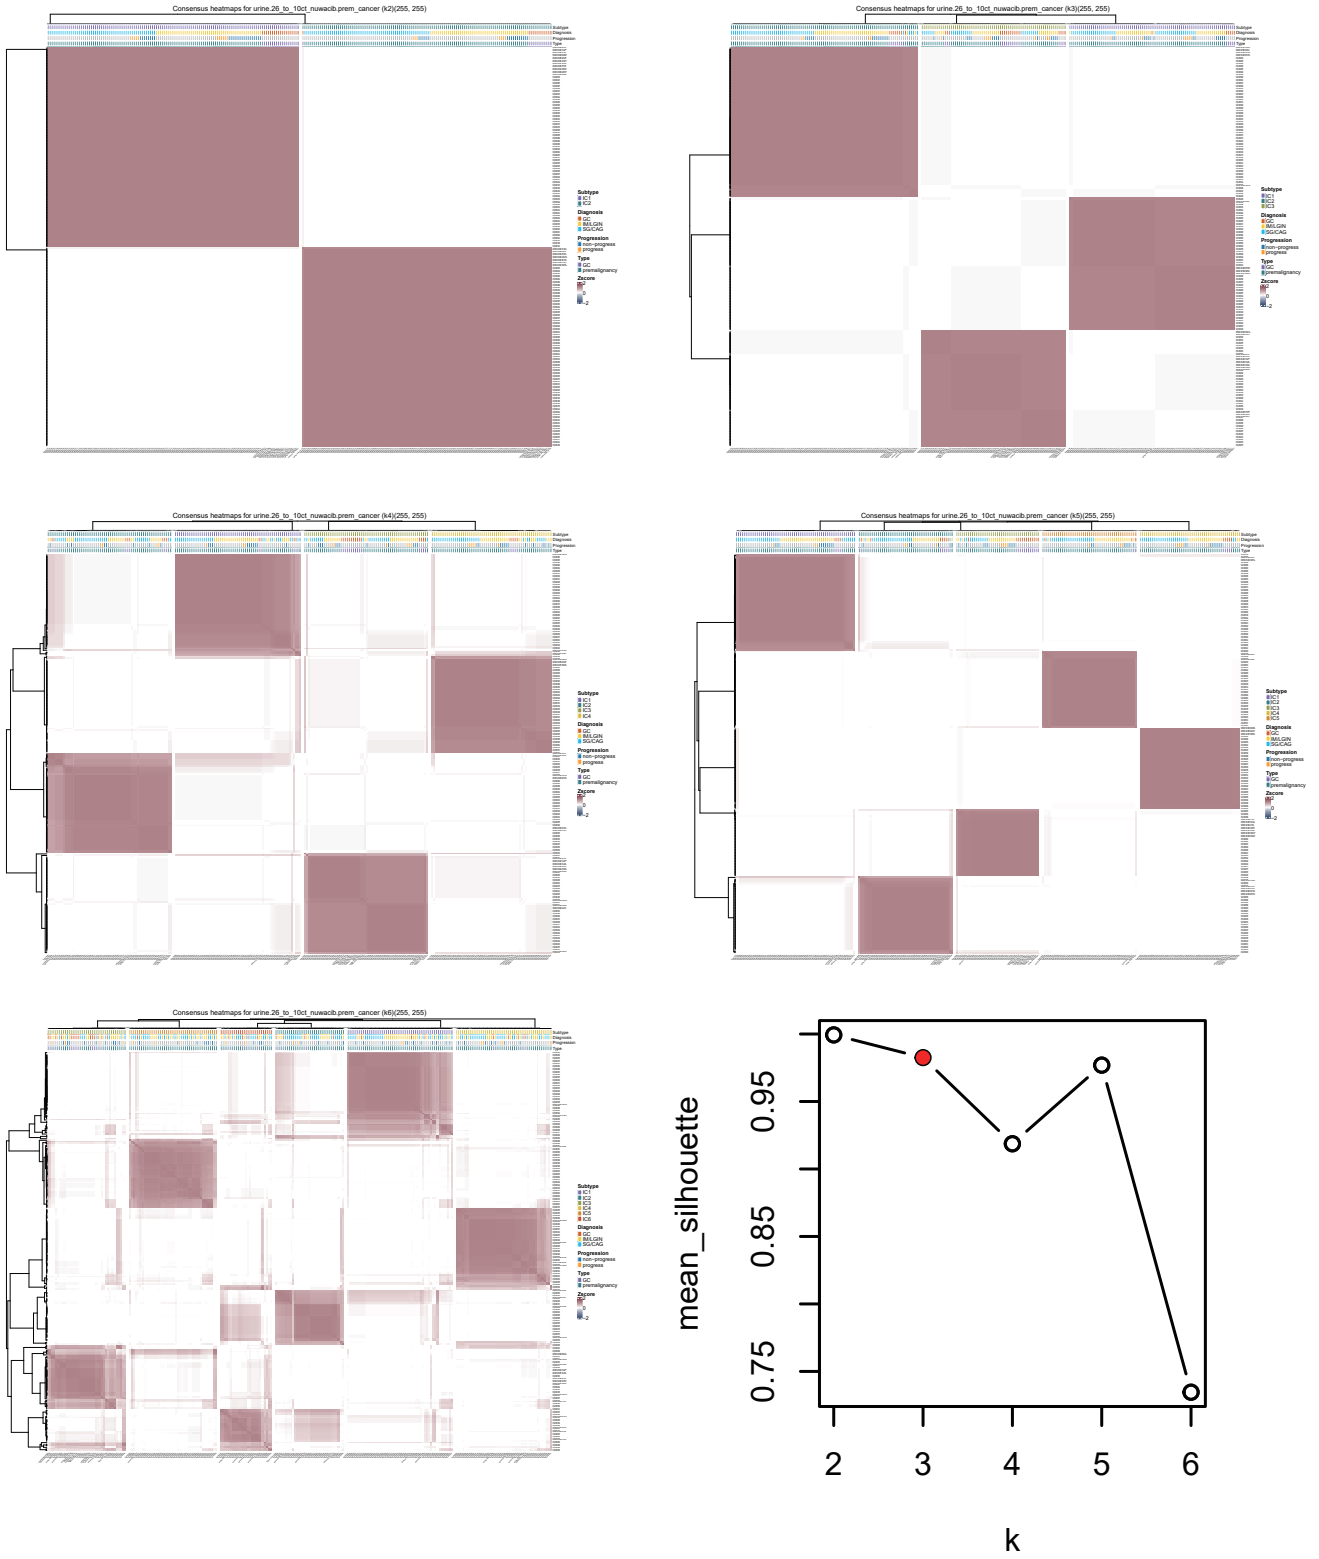

b

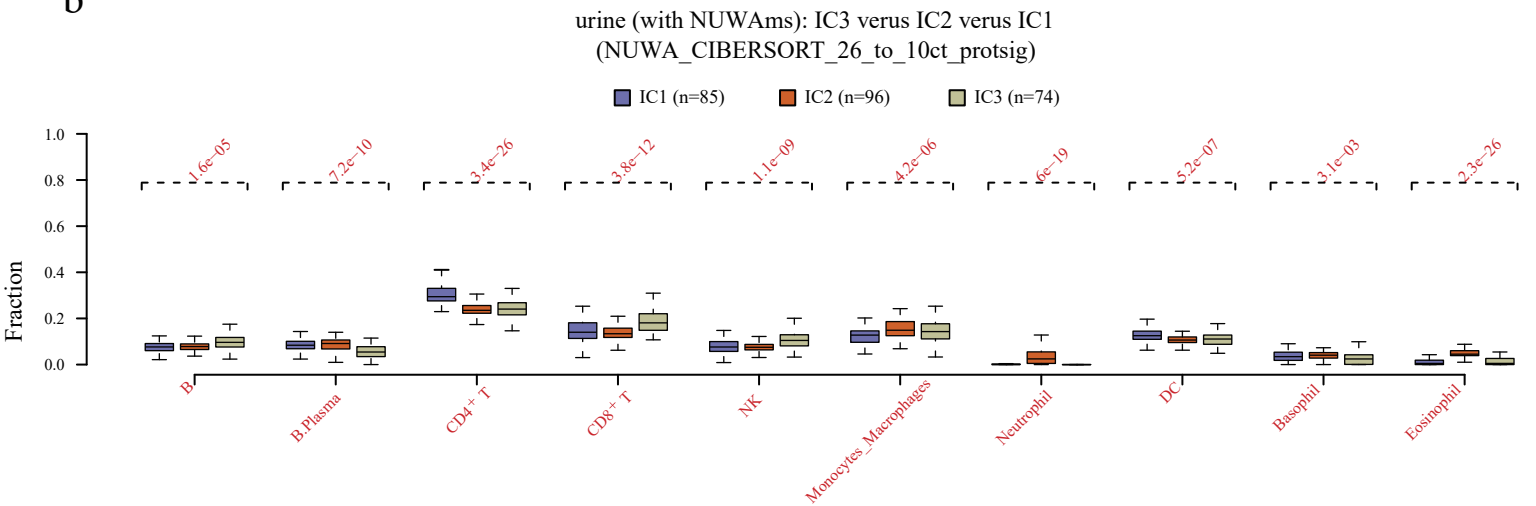

Supplement: mmc2.pdf [file mmc2.pdf]
